# Supplementary material for: Normalization of Tumor Vasculature by Oxygen Microbubbles with Ultrasound
Source: Theranostics. 2019 Sep 25;9(24):7370–83. doi: 10.7150/thno.37750 (PMC6831304; doi:10.7150/thno.37750)
Supplement: Supplementary file 1 — Supplementary figures and tables. [file thnov09p7370s1.pdf]

## Supplementary Information

**Titles:** Normalization of Tumor Vasculature by Oxygen Microbubbles with Ultrasound

**Authors:** Yi-Ju Ho<sup>1</sup>, Shu-Wei Chu<sup>1</sup>, En-Chi Liao<sup>2</sup>, Ching-Hsiang Fan<sup>1</sup>, Hong-Lin Chan<sup>2</sup>, Kuo-Chen Wei<sup>3</sup>, and Chih-Kuang Yeh<sup>1\*</sup>

<sup>1</sup>Department of Biomedical Engineering and Environmental Sciences, National Tsing Hua University, Hsinchu, Taiwan.

<sup>2</sup>Institute of Bioinformatics and Structural Biology & Department of Medical Sciences, National Tsing Hua University, Hsinchu, Taiwan.

<sup>3</sup>Department of Neurosurgery, Chang Gung Memorial Hospital, Taoyuan, Taiwan.

\*Corresponding authors at:

Department of Biomedical Engineering and Environmental Sciences, National Tsing Hua University, No. 101, Section 2, Kuang-Fu Road, Hsinchu 30013, Taiwan.

Tel: +886-3-571-5131 ext. 34240; Fax: +886-3-571-8649

E-mail address: [ckych@mx.nthu.edu.tw](mailto:ckych@mx.nthu.edu.tw)

**This file includes:**

Figure S1 to S5

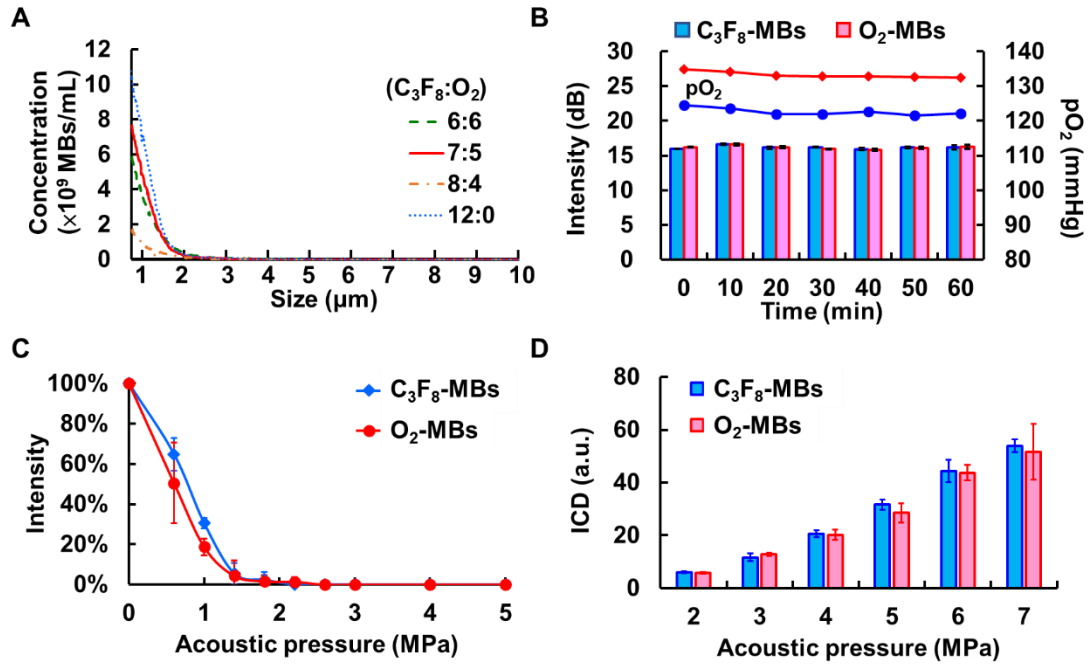

**Figure S1.** Physical and acoustic characteristics of C<sub>3</sub>F<sub>8</sub>-MBs and O<sub>2</sub>-MBs. (A) The size distribution of O<sub>2</sub>-MBs with various volume ratios of C<sub>3</sub>F<sub>8</sub> and O<sub>2</sub>. The optimal C<sub>3</sub>F<sub>8</sub>:O<sub>2</sub> volume ratio for O<sub>2</sub>-MBs fabrication was 7:5. (B) The contrast enhancement of US images and pO<sub>2</sub> levels were measured to evaluate the stability of MBs *in vitro*. The contrast enhancement and pO<sub>2</sub> levels revealed no significant difference after 60 min at 37 °C in the C<sub>3</sub>F<sub>8</sub>-MBs and O<sub>2</sub>-MBs groups. (C) The MBs destruction threshold under 2-MHz HIFU sonication was analyzed to determine the optimal acoustic pressure for local oxygen release. The MBs destruction at acoustic pressure of 2 MPa was 100%. (D) The ICD was determined to evaluate the possible bio-effects during MBs destruction. The ICD is directly proportional to the acoustic pressure. The physical and acoustic characteristics between C<sub>3</sub>F<sub>8</sub>-MBs and O<sub>2</sub>-MBs were not significantly different. Quantitative data are presented as mean ± standard deviation and were analyzed by one-way ANOVA.

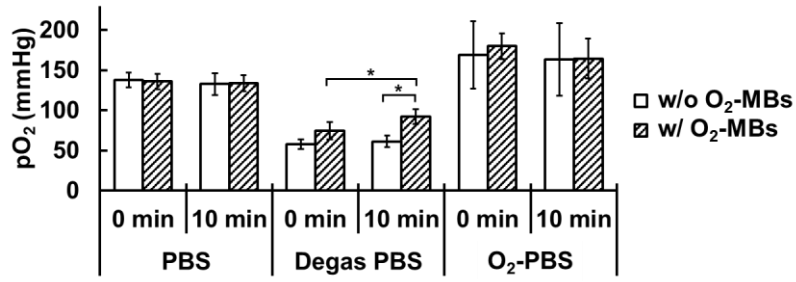

**Figure S2.** *In vitro* pO<sub>2</sub> levels of  $1 \times 10^7$  O<sub>2</sub>-MBs in the PBS, degas PBS, and O<sub>2</sub>-PBS. The PBS was degassed for 3 min and infused O<sub>2</sub> for 1 min to prepare O<sub>2</sub>-PBS. During O<sub>2</sub> infusion, the needle was immersed into PBS to observe the bubble production. The initial pO<sub>2</sub> was  $138 \pm 9$ ,  $58 \pm 6$ , and  $169 \pm 42$  mmHg in the PBS, degas PBS, and O<sub>2</sub>-PBS, respectively. In the degas PBS group, the pO<sub>2</sub> was significantly increased from  $75 \pm 11$  to  $92 \pm 9$  at 0 to 10 min due to the oxygen release from O<sub>2</sub>-MBs. The results showed no significant difference over time in the PBS and O<sub>2</sub>-PBS groups. The legends of w/o and w/ mean without O<sub>2</sub>-MBs and with O<sub>2</sub>-MBs, respectively.

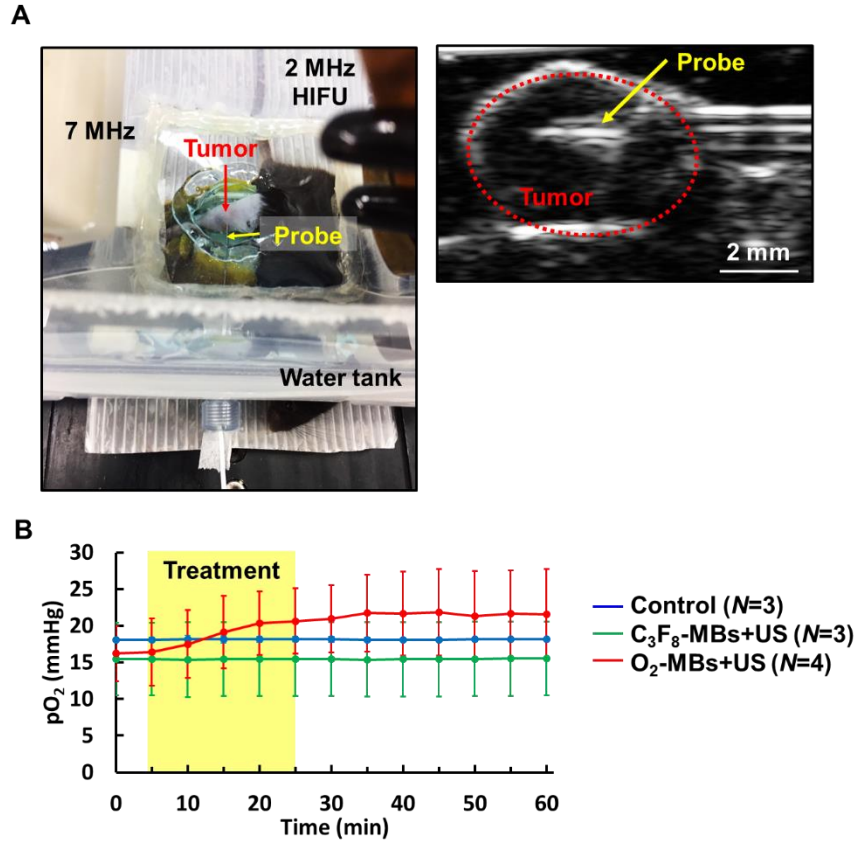

**Figure S3.** (A) The experimental setup of intratumoral pO<sub>2</sub> detection during O<sub>2</sub>-MBs treatment. The US imaging revealed the inserted location of a fiberoptic pO<sub>2</sub> probe at tumor center. (B) The intratumoral pO<sub>2</sub> levels were 18±2 to 18±2, 15±5 to 16±5, and 16±4 to 22±6 mmHg at 0 to 60 min in the control, C<sub>3</sub>F<sub>8</sub>-MBs+US, and O<sub>2</sub>-MBs+US groups, respectively. Although the results showed increment of intratumoral pO<sub>2</sub> levels after O<sub>2</sub>-MBs treatment, there was no significant difference between each group due to the different initial pO<sub>2</sub> levels.

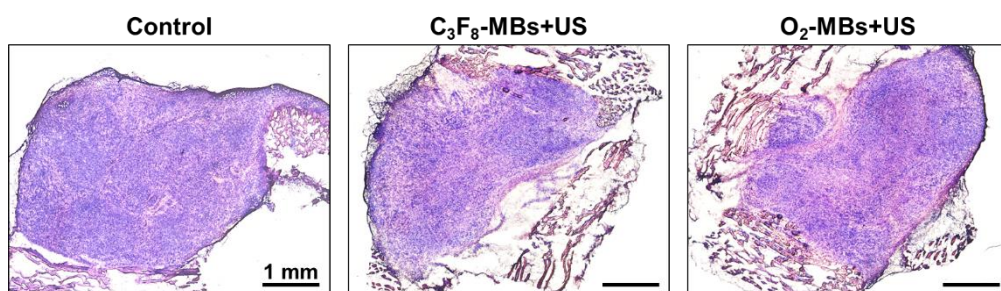

**Figure S4.** Histological images stained by H&E revealed intact tumor structure without hemorrhage and necrosis after O<sub>2</sub>-MBs treatment.

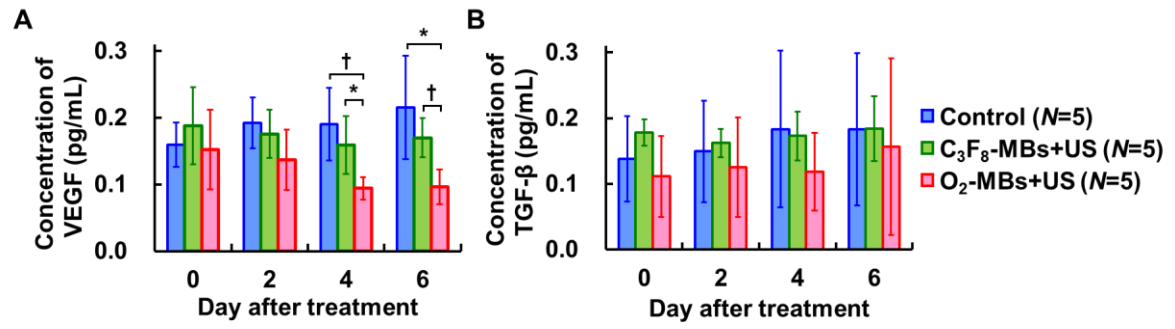

**Figure S5.** The variability in protein expression after O<sub>2</sub>-MBs treatment. The concentrations of (A) VEGF and (B) TGF-β were traced over time by *in vivo* microdialysis and measured by ELISA assay. Bars are shown as means with error bars depicting the standard deviation. Data were analyzed by one-way ANOVA (\*  $p < 0.05$ ; †  $p < 0.01$ ).
